# Supplementary material
Source: publisher site journal article supplement (https://www.dovepress.com/article/234651)
Supplement: Supplementary file 1 [file get_supplementary_file.php]

## Supplementary Material

Supplementary Table 1 PubMed and EMBASE search strategies

| **Number** | **Search terms** |
| --- | --- |
| 1 | “asthma” |
| 2 | “qualitative” OR “qualitatively” OR “semi-structured” OR “semistructured” OR “structured” OR “focus group*” OR “focus-group*” OR “interview*” OR “ethnograph*” OR “grounded theory” OR “content analy*” OR “thematic*” OR “in-depth” OR “in depth” OR “face-to-face” OR “open-ended” OR “open ended” OR “phenomenolog*” OR “phenomenograph*” |
| 3 | #1 AND #2 |
| 4 | “adheren*” OR “non-adheren*” OR “nonadheren*” OR “non adheren*” OR “complian*” OR “non-complian*” OR “noncomplian” OR “non complian*” OR “comply” OR "persistence" OR “discontinuation” |
| 5 | “overuse*” OR “over use*” OR “overutiliz*” OR “over utiliz*” OR “over-reliance” OR “over reliance” OR “high use” OR “high-use” |
| 6 | “underuse*” OR “under use*” OR “underutiliz*” OR “under utilize*” OR “under-reliance” OR “under reliance” OR “low use” OR “low-use” |
| 7 | “inappropriate” OR “appropriate” OR “excessive” |
| 8 | #4 OR #5 OR #6 OR #7 |
| 9 | #3 and #8 |
| 10 | Limits |
|  | Limit to articles published since 1 January 2012 |
|  | Limit to humans, articles published in English and articles with an abstract |
|  | Exclude conference/congress abstracts/posters |
|  | Exclude newborn[tiab] or pediatric[tiab] or child[tiab] or children[tiab] or infant[tiab] |
| 11 | #9 NOT #10 |

Supplementary Table 2 Reasons for article ineligibility after abstract screening (n=171)

| **Reason** | **n (%)** |
| --- | --- |
| Survey research | 50 (29) |
| Asthma as comorbidity (not the primary disease under investigation) | 24 (14) |
| Clinical research | 21 (12) |
| Intervention studies other than medication adherence | 14 (8) |
| ‘Think piece’ | 12 (7) |
| Adherence intervention studies | 11 (6) |
| Inhaler device/technique studies | 6 (5) |
| Surveys of physicians/nurses not specific to medication adherence | 6 (5) |
| Surveillance/epidemiological studies | 5 (3) |
| Patient-reported outcome development studies | 4 (2) |
| Treatment guideline studies | 3 (2) |
| Real-world studies | 3 (2) |
| Clinical research recruitment studies | 3 (2) |
| Expert panels on disease management/health technology assessment | 3 (2) |
| Negotiated asthma treatment plan studies | 2 (1) |
| Other (e.g., theory, quality improvement, patient education materials, physician coaching) | 4 (2) |

Supplementary Table 3 Reasons for article ineligibility after full-text screening (n=26)

| **Reason** | **n (%)** |
| --- | --- |
| Other qualitative research in asthma not specific to medication adherence | 5 (19) |
| Mobile health/asthma websites | 4 (15) |
| Survey research | 3 (11) |
| Surveys of physicians/nurses not specific to medication adherence | 3 (11) |
| Adherence intervention studies | 2 (8) |
| Inhaler device/technique studies | 2 (8) |
| Patient-reported outcome development studies | 2 (8) |
| Clinical research recruitment studies | 1 (4) |
| Systematic review | 1 (4) |
| Chart review | 1 (4) |
| Psychosocial stress in asthma | 1 (4) |
| Student health center directors | 1 (4) |

**Supplementary Table 4** Summary of qualitative evidence on medication adherence in asthma

| **Study** | **Study design** | **Study objectives** | **Sample size** | **Inclusion criteria** | **Exclusion criteria** | **Treatment** | **Outcomes** |
| --- | --- | --- | --- | --- | --- | --- | --- |
| **US** | | | | | | | |
| Blaakman et al39  2014 | One-on-one interviews conducted during the  2009–2010 school year | To understand urban teens’ experiences with asthma management, maintenance medication adherence, and participation in a school‑based intervention | 28 | Patients (12–15 years old) with physician-diagnosed asthma, with persistent symptoms and who were prescribed daily inhaled maintenance asthma medications | NR | ICS, DOT (with school nurse), MI (3 sessions) | Qualitative research |
| Choi et al40  2008 | One-on-one interviews conducted between  April and September 2003 | To identify patients’ beliefs about asthma medications and to assess these beliefs according to patient and asthma characteristics, including asthma severity and patient-reported medication adherence | 52 | English-speaking adults who were prescribed daily asthma medication | NR | SABA, ICS, LTRAs, mast cell stabilizers, methyl xanthines, anticholinergics, systemic corticosteroids, and LABA | Severity of Asthma Scalea; Morisky Medication Adherence Questionnaire (4-item)b |
| George et al31  2015 | One-on-one interviews | To identify urban adults’ perceptions of facilitators and barriers to asthma control, including the role of self-care, medications, and environmental trigger remediation | 35 | Patients (>21 years old) with physician-diagnosed persistent asthma and current prescription of ICS treatment for asthma | Non–English-speaking patients; those with serious mental health conditions that would affect study participation or ability of the individual to provide full informed consent | ICS and SABA | Influencers of adherence |
| Janevic et al28  2014 | One-on-one interviews | To gain an in-depth understanding of how African American women with asthma perceive their experience of managing MCCs | 25 | African American female patients who reported a physician diagnosis of one or more of the following conditions in addition to asthma: T2DM, heart disease and taking daily heart medications, or arthritis requiring daily medication | NR | NR | Self-management challenges faced by African American women with asthma and comorbidities |
| Mowrer et al18  2015 | Focus groups  conducted every 6 months for 3 years | To explore patient and provider perceptions of asthma and asthma care | ~200 patients and providers | Patients (adults and pediatric), parents, physicians, and nurses across 15 practices. Practice settings included pediatrics, internal medicine, and family medicine | NR | NR | Patient and provider perceptions of asthma and asthma care |
| Naimi et al25  2009 | One-on-one interviews conducted between  December 2006 and November 2007 | To describe adherence to maintenance asthma medications and to explore relevant beliefs and attitudes in older urban adolescents, including their ideas for improving adherence | 40 | Patients (aged 15–21 years) with moderate or severe persistent asthma according to the National Asthma Education and Prevention Program Expert Panel Report guidelines, and prescribed fluticasone/salmeterol | NR | ICS (fluticasone/ salmeterol) | Adherencec monitoring via the Diskus Adherence Monitor that recorded date and time of an inhalation |
| Quaranta et al37  2014 | Focus groups conducted in  June and July 2009 | To understand how self‑management behaviors of adolescent patients with asthma are influenced by the perceived expectations (normative beliefs/subjective norms) for self‑management behaviors from healthcare providers, school nurses, teachers, family, and friends | 7 | Patients recruited by nurses from 2 rural middle/high schools in upstate New York | NR | NR | Qualitative research |
| Speck et al29  2014 | Focus groups conducted from  November–December 2012 | To better understand the barriers to optimal asthma management, identify strategies to improve asthma management, and explore preferences for participating in an asthma self‑management program | 34 | Patients who self-identified as African American, with a physician diagnosis of persistent asthma deﬁned as currently using a controller medication (ICS, ICS plus LABA, or a leukotriene modiﬁer) daily, using a reliever medication at least 3 times per week or having been to the emergency department in the past year because of asthma | Any other significant cardiopulmonary disease, a smoking history of >20 pack-years, not fluent in English or a significant cognitive impairment that would make participation in a focus group impossible | Asthma controller medication (ICS, ICS plus LABA, or a leukotriene modiﬁer) | Detailed descriptions of concerns, fears, and challenges related to asthma |
| Wamboldt et al30  2011 | Focus groups | To examine beliefs, feelings, and behaviors in adolescents and young adults with asthma that underlie their use of inhaled asthma controller medications to help providers maximize treatment adherence | 26 | Patients (aged 7–16 years) with a physician diagnosis of persistent asthma and currently prescribed an ICS | NR | ICS | Qualitative research |
| **Canada** | | | | | | | |
| Peláez et al34  2014 | Focus groups conducted over 3 months | To examine the perspectives of patients with asthma, physicians, and allied health professionals regarding adherence to asthma medication | 38 (13 patients with asthma, 13 pulmonol-ogist physicians, and 12 allied health profession-als involved in treating patients with asthma) | Adult patients with a diagnosis of asthma who could speak French and had a prescription for ICS for at least 12 months  Physicians/allied health professionals: either pulmonologists or allied health professionals who were working in the pulmonology department of the Hôpital du Sacré-Coeur de Montreal, Montreal, Quebec | NR | Budesonide and formoterol 200, 400, or  800 mg/day  Fluticasone propionate 250, 500, 1000, or 2000 mg/day  Fluticasone and salmeterol 250 or 500 mg/day | Barriers to medication adherence |
| Peláez et al35  2016 | Focus groups  conducted between February and June 2009 | To understand how patients’ adherence to long-term asthma controller medication may be improved and facilitated by comparing key asthma stakeholders’ perspectives | 38 (13 asthma patients, 13 pulmonolo-gist physicians, and 12 allied health profession-als involved in treating patients with asthma) | Patients (18–75 years) with a primary diagnosis of asthma confirmed by chart evidence of a 20% fall in FEV1 after methacholine challenge and/or bronchodilator reversibility in FEV1 of ≥16%, and who had a prescription for ICS for at least 12 months | NR | ICS | Facilitators and barriers to prescribed long-term controller medication |
| Peláez et al36  2015 | One-on-one interviews conducted between  June and September 2011 | To gain insight into factors that are perceived by patients as hindering or fostering their daily adherence to ICS | 24 (16 adults with asthma) | Patients who had (or were parents of a child with) a confirmed diagnosis of asthma, who had visited a physician and renewed a prescription for ICS in the past year | NR | ICS | Barriers and facilitators to adherence |
| **Australia** | | | | | | | |
| Davis et al23  2016 | One-on-one interviews | To explore the level of understanding of asthma medication use in people with intellectual disability who self-administer their inhaled medications; this analysis would help to inform future educational support | 17 | Adult patients with intellectual disability (clinical judgment/receiving support from relevant organizations), physician-diagnosed asthma, and self-administration of asthma medication | NR | Maintenance (ICS) and reliever (SABA) medications | Qualitative research |
| Foster et al27  2017 | One-on-one interviews conducted over 6 months | To explore the attitudes of patients with asthma towards accepting electronic adherence monitoring and the usefulness of medication reminders for missed doses and adherence feedback after 6 months of use (SmartTrack adherence monitors) | 18 | Patients (aged ≥14 years) with moderate-to-severe asthma who were prescribed twice daily ICS/LABA for ≥1 month before enrollment, who had no asthma exacerbation in the last month, and had suboptimal asthma control (Asthma Control Test score ≤19)  Subsample of patients who received an inhaler-based “reminder and feedback” intervention were invited to take part in a qualitative interview | NR | Inhaled fluticasone propionate/ salmeterol xinafoate | 100 mm long visual analogue scale from “not at all satisfied” to “extremely satisfied” |
| McDonald et al24  2013 | One-on-one interviews | To explore older peoples’ experiences of asthma, COPD and asthma-COPD overlap regarding their journey in the healthcare system | 21 | Patients (aged ≥55 years) with  airflow obstruction defined by a pre‑bronchodilator FER <0.7 and FEV1 <80% predicted and prior physician diagnosis of an obstructive airway disease, either asthma or COPD, or an overlapping pattern | NR | NR | Experiences in the healthcare system |
| **Sweden** | | | | | | | |
| Axelsson et al32  2011 | One-on-one interviews | To understand adherence behavior in young adults by studying adherence in view of personal characteristic adaptation and to elucidate adherence reasoning in relation to asthma medication | 18 | Adults with asthma born between 1985 and 1987, who were prescribed regular asthma medication and who completed an adherence questionnaire | NR | ICS, SABA, and combined inhaler (single inhaler combining ICS and LABA) | Qualitative research |
| Axelsson38  2013 | Open-ended questions within the context of a survey | To identify reasons for poor medication adherence to asthma medication in young adults | 216 | Patients from the original cohort who reported asthma diagnosis, reported clinically verified asthma, and responded to the following query: “If I don’t take the asthma medication the most common reason is” | NR | ICS, combination therapy (ICS + LABA), SABA, LABA | Reasons for non-adherence; perception and control of asthma and how it impacts medication intake |
| **UK** | | | | | | | |
| Edgecombe et al26  2010 | One-on-one interviews conducted between  June 2006 and August 2007 | To understand adolescents’ experiences and to use this understanding to improve their clinical management of asthma | 22 | Patients with uncontrolled severe asthma defined as symptoms more than twice a week despite the use of at least 800 µg/day inhaled beclomethasone equivalent | Adolescents with other non-atopic chronic medical conditions that could affect their quality of life | At least 800 µg/day inhaled beclomethasone equivalent | Pediatric Asthma Quality of Life Questionnaire; generic quality of life assessment tool consisting of a 10 cm line marked with 0–100 |
| Murdoch et al42  2013 | One-on-one interviews | To elicit the experiences and perspectives of patients prescribed prophylactic medications and to examine their perspective about their condition and medications | 26 | Patients prescribed a prophylactic asthma medication—either an ICS or a tablet prophylaxis—who were clinically assessed as having inadequate asthma control and quality of life, measured by a combination of breathing tests and questionnaires, and with a record of “previous non-adherence” | NR | ICS or a tablet prophylaxis | Qualitative research |
| **Netherlands** | | | | | | | |
| Koster et al41  2015 | Two online focus groups (December 2013) and one face-to-face focus group (March 2014) | To assess the needs and preferences of adolescent patients with asthma regarding medication counseling and support, with a focus on new media | 21 | Online focus groups: patients (aged 12–16 years) with a prescription filling of at least 2 ICS prescriptions during the last 2 years, of which ≥1 prescription was filled during the previous year  Face-to-face focus groups: patients (aged 12–16 years) with a physician diagnosis of asthma and current medication use | Online focus groups: patients who used asthma medication as a first prescription trial  Face-to-face: NR | ICS | Self-reported adherence |
| **Germany** | | | | | | | |
| Lingner et al33  2017 | Focus groups | To investigate both patients’ and physicians’ concepts of good asthma treatment and to compare them with one another and with current asthma treatment recommendations | 37 | Patients (aged >18 years) with a diagnosis of asthma in their patient records | NR | NR | Perceptions of “good asthma therapy” |

**Notes**: aSeverity of Asthma Scale is a 13-item survey that assesses long-term asthma status; scores range from 0 to 28, with higher scores indicating more severe asthma.

bMorisky Medication Adherence Questionnaire comprises 4 items addressing active and passive reasons for not taking medications; scores range from 0 to 4, with a higher score indicating worse adherence.

cAdherence was calculated as (total truncated number of actuations recorded over all monitoring periods)/(the number of monitoring periods) × 100.

**Abbreviations**: COPD, chronic obstructive pulmonary disease; DOT, directly observed medication therapy; FER, forced expiratory ratio; FEV1, forced expiratory volume in 1 second; ICS, inhaled corticosteroids; LABA, long-acting β2-agonist; LTRA, leukotriene receptor antagonist; MCC, multiple chronic condition; MI, motivational interviewing; NR, not reported; SABA, short-acting β2-agonist; T2DM, type 2 diabetes mellitus; UK, United Kingdom; US, United States.
